# Supplementary material for: RETRACTED ARTICLE: Polymerase θ inhibition activates the cGAS-STING pathway and cooperates with immune checkpoint blockade in models of BRCA-deficient cancer
Source: Springer Nature journal article supplement (doi:10.1038/s41467-023-37096-6), 2023-03-13

## **Supplementary Information**

**Polymerase  $\theta$  inhibition activates the cGAS-STING pathway and cooperates with immune checkpoint blockade in models of BRCA-deficient cancer**

Jeffrey Patterson-Fortin, Heta Jadhav, Constantia Pantelidou, Tin Phan, Carter Grochala, Anita K. Mehta, Jennifer L. Guerriero, Gerburg M. Wulf, Brian M. Wolpin, Ben Z. Stanger, Andrew J. Aguirre, James M. Cleary, Alan D. D'Andrea, Geoffrey I. Shapiro

**Supplementary figures and legends 1 to 7**

**Supplementary tables 1 and 2**

**Source data for immunoblots presented in Supplementary figures 1 and 6**

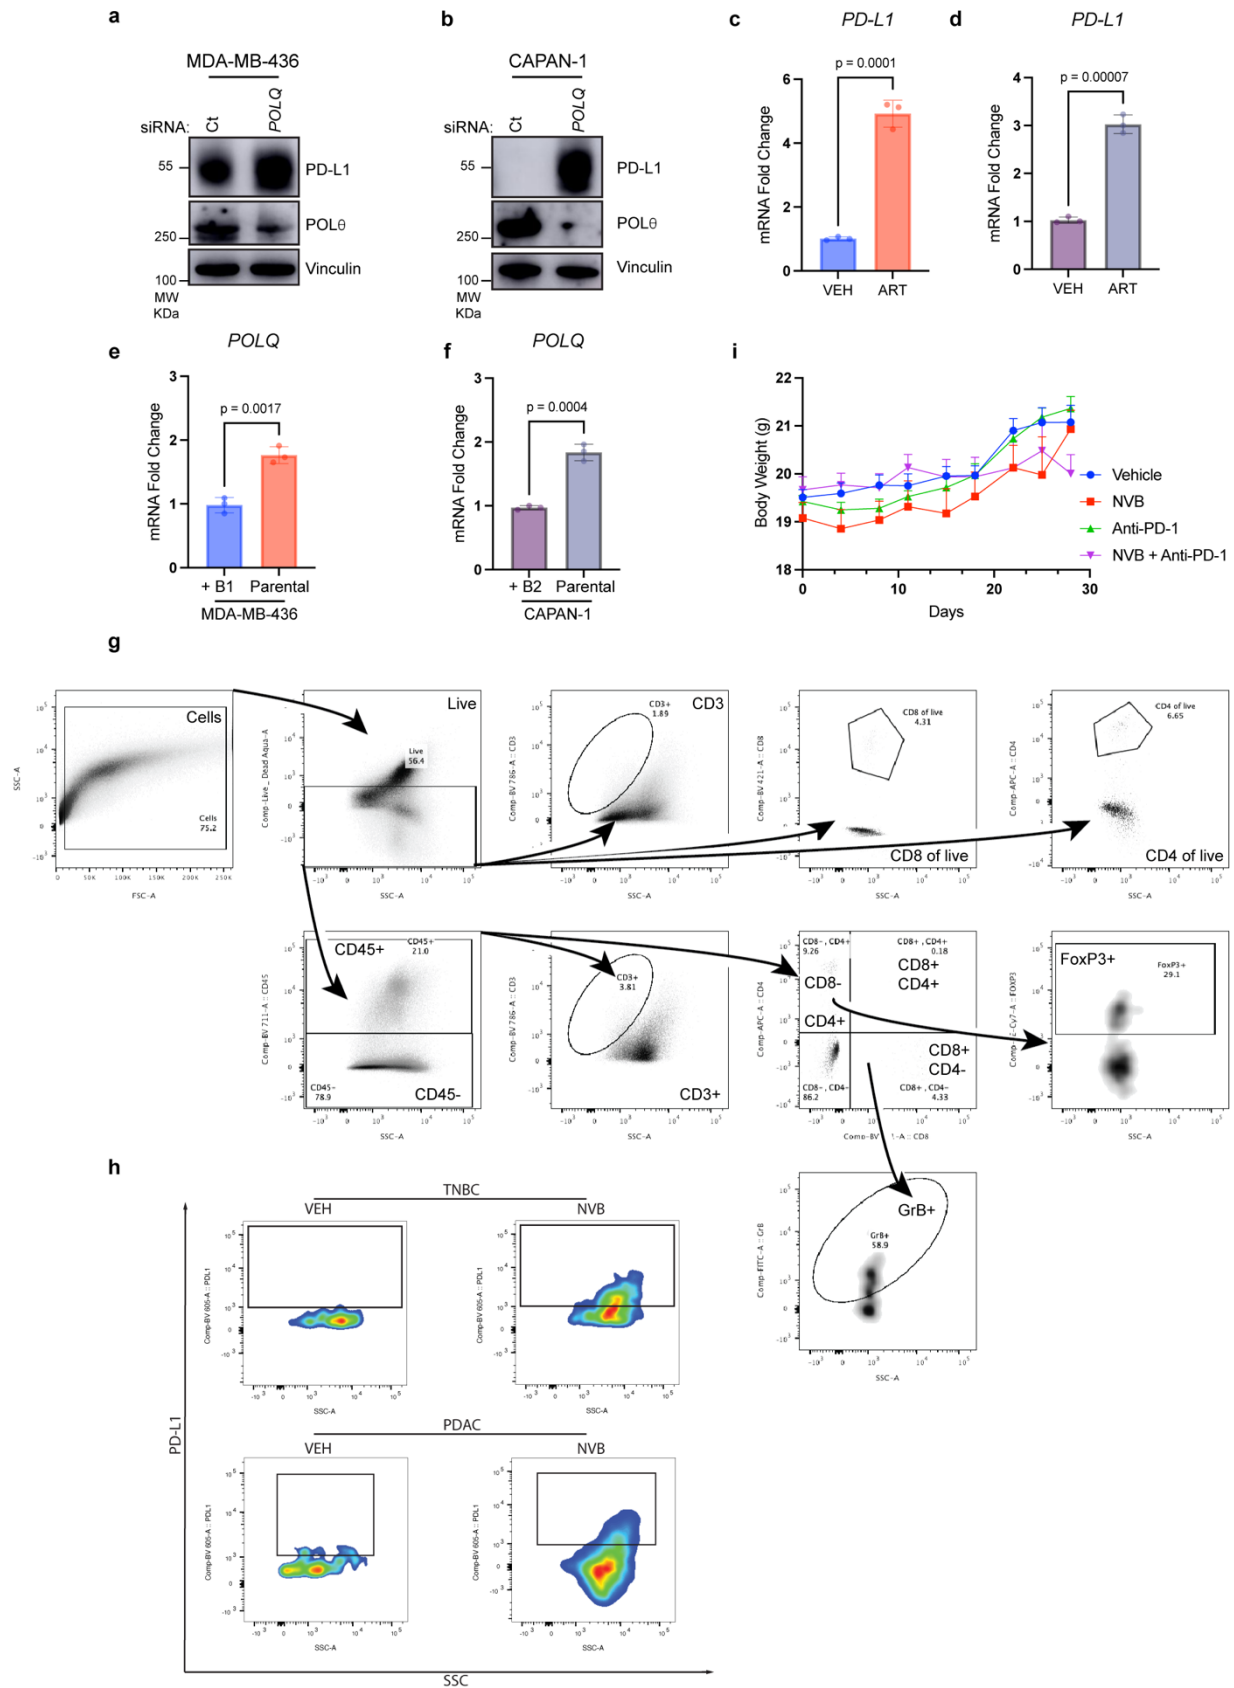

**Supplementary Fig. 1. *POLQ* depletion or *POLθ* inhibition enhances PD-L1 expression and is well tolerated in combination with anti-PD-1 blockade.** **a** and **b**, Detection of PD-L1 protein by immunoblot in homologous recombination deficient *BRCA1*-deficient MDA-MB-436 triple negative breast cancer cells (**a**), or homologous recombination deficient *BRCA2*-deficient CAPAN-1 pancreatic cells (**b**) treated with siRNA to deplete *POLQ*. Vinculin serves as an internal loading control. Immunoblot analysis **c** and **d**, Level of *PD-L1* mRNA in MDA-MB-436 cells (**c**), or CAPAN-1 cells (**d**) treated with 1  $\mu$ M ART558 (ART) for 48 hours. Transcript levels are measured relative to *ACTB* by qPCR. Data, mean $\pm$  SD of 3 independent experiments, unpaired two-tailed *t* test. **e** and **f**, *POLQ* mRNA expression in MDA-MB-436 +/- *BRCA1* WT (**e**), or CAPAN-1 +/- *BRCA2* WT (**f**). Transcript levels are measured relative to *ACTB* by qPCR. Data, mean $\pm$  SD of 3 independent experiments, unpaired two-tailed *t* test. **g**, Representative gating strategy for flow cytometry analysis of TNBC and PDAC tumors. **h**, Representative PD-L1+ flow cytometry dotplots of TNBC and PDAC tumors from **1h**, and **j**. **i**, Bodyweight measurements of mice (VEH, *n* = 11; NVB, *n* = 10; isotype, *n* = 11; anti-PD-1, *n* = 11) from **1i**. Data, mean  $\pm$  SEM.

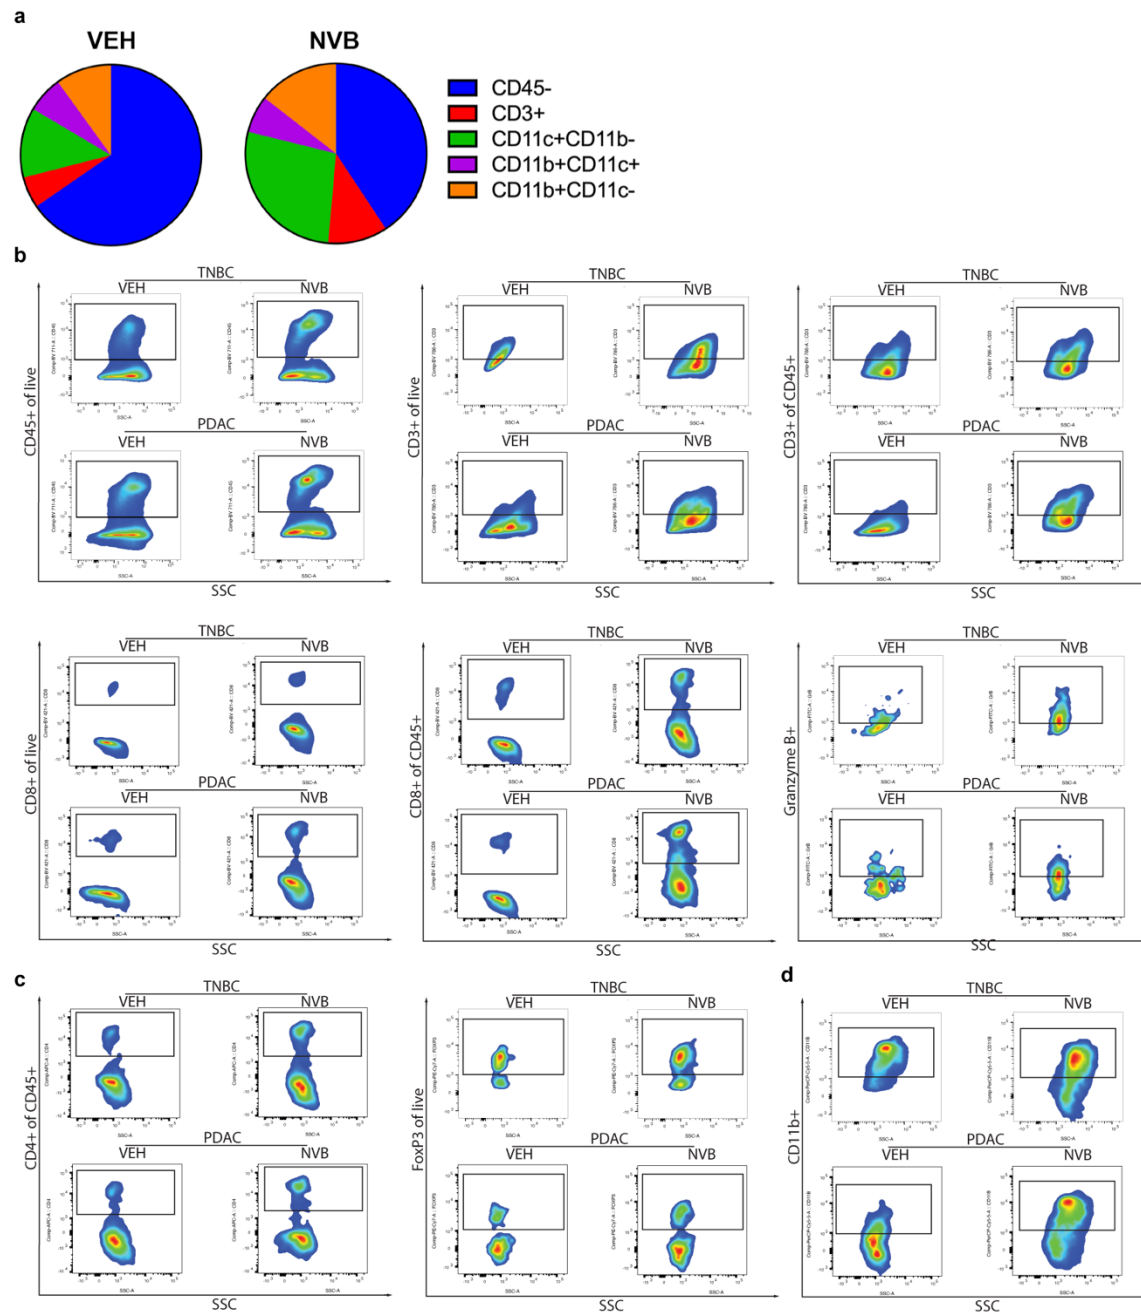

**Supplementary Fig. 2. Diverse immune cell recruitment secondary to POLθ inhibition in HR-deficient cancers. a**, Pie chart from vehicle or NVB-treated mice from **1e** showing the proportions of different cell types (as a percentage of total live events) in the tumor microenvironment. **b**, **c**, and **d**, Representative flow cytometry dotplots of TNBC and PDAC tumors from **2c-h**.

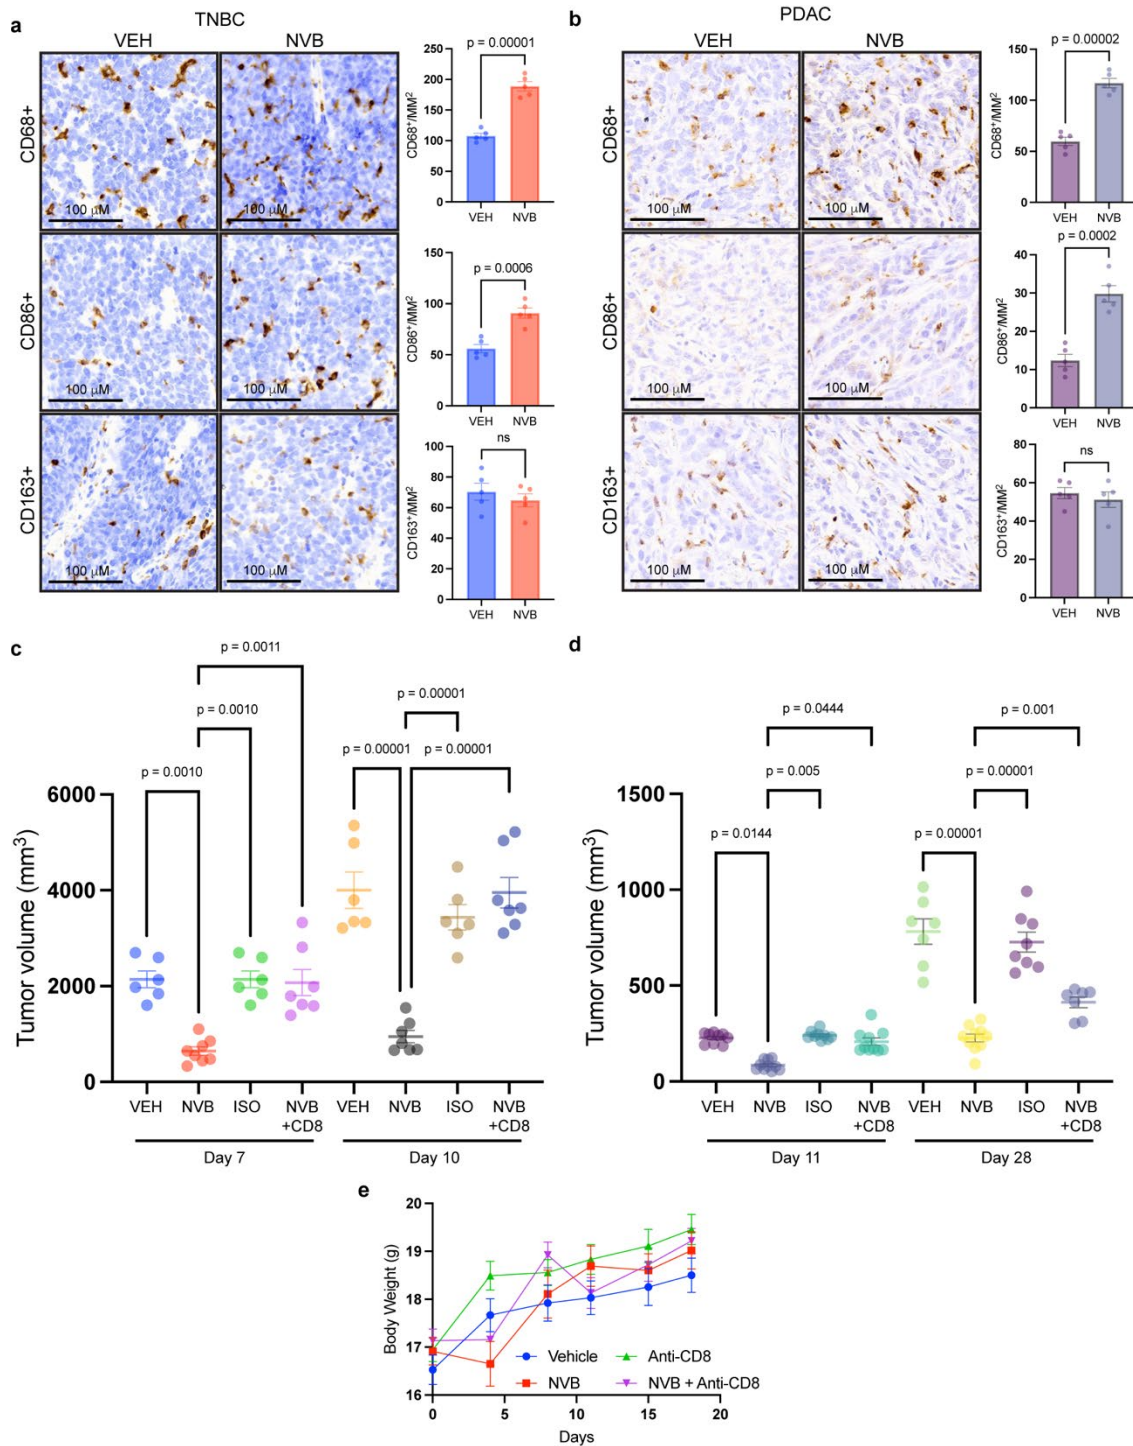

**Supplementary Fig. 3. Efficacy of POL $\theta$  inhibition in HR-deficient cancers requires CD8+ T-cells.** **a**, Pie chart from vehicle or NVB-treated mice from **1e** showing the proportions of different cell types (as a percentage of total live events) in the tumor microenvironment. **a** and **b**, TNBC (VEH,  $n = 5$ ; NVB,  $n = 5$ ) (**b**) or PDAC (VEH,  $n = 5$ ; NVB,  $n = 5$ ) (**c**) tumor chunks were subjected

to IHC for CD68, CD86, and CD163 (left) expression. CD68 is a marker for all macrophages, CD86 is a marker for M1 macrophages, and CD163 is a marker for M2 macrophages<sup>40</sup>. Representative IHC images at 40x magnification, scale bars, 100  $\mu$ M. IHC staining was quantified using Aperio algorithms (right). Data, mean  $\pm$  SEM, unpaired two-way *t*-tests. **d** and **e**, Individual TNBC tumor volumes ( $\text{mm}^3$ ) of mice treated with vehicle ( $n = 6$ ) or NVB (75 mg/kg twice daily;  $n = 8$ ), along with isotype control ( $n = 6$ ) or an anti-CD8 antibody (200  $\mu$ g twice weekly;  $n = 8$ ) (**c**) or PDAC tumor volumes ( $\text{mm}^3$ ) of mice treated with vehicle ( $n = 9$ ) or NVB (75 mg/kg twice daily;  $n = 10$ ), along with isotype control ( $n = 9$ ) or an anti-CD8 antibody (200  $\mu$ g twice weekly;  $n = 10$ ) (**d**) at indicated days from **2i** and **2j** respectively. Error bars, SEM. Statistical analysis was performed using one-way ANOVA. **e**, Bodyweight measurements of mice from **2j** (VEH,  $n = 9$ ; NVB,  $n = 10$ ; isotype,  $n = 9$ ; anti-CD8,  $n = 10$ ). Data, mean  $\pm$  SEM.

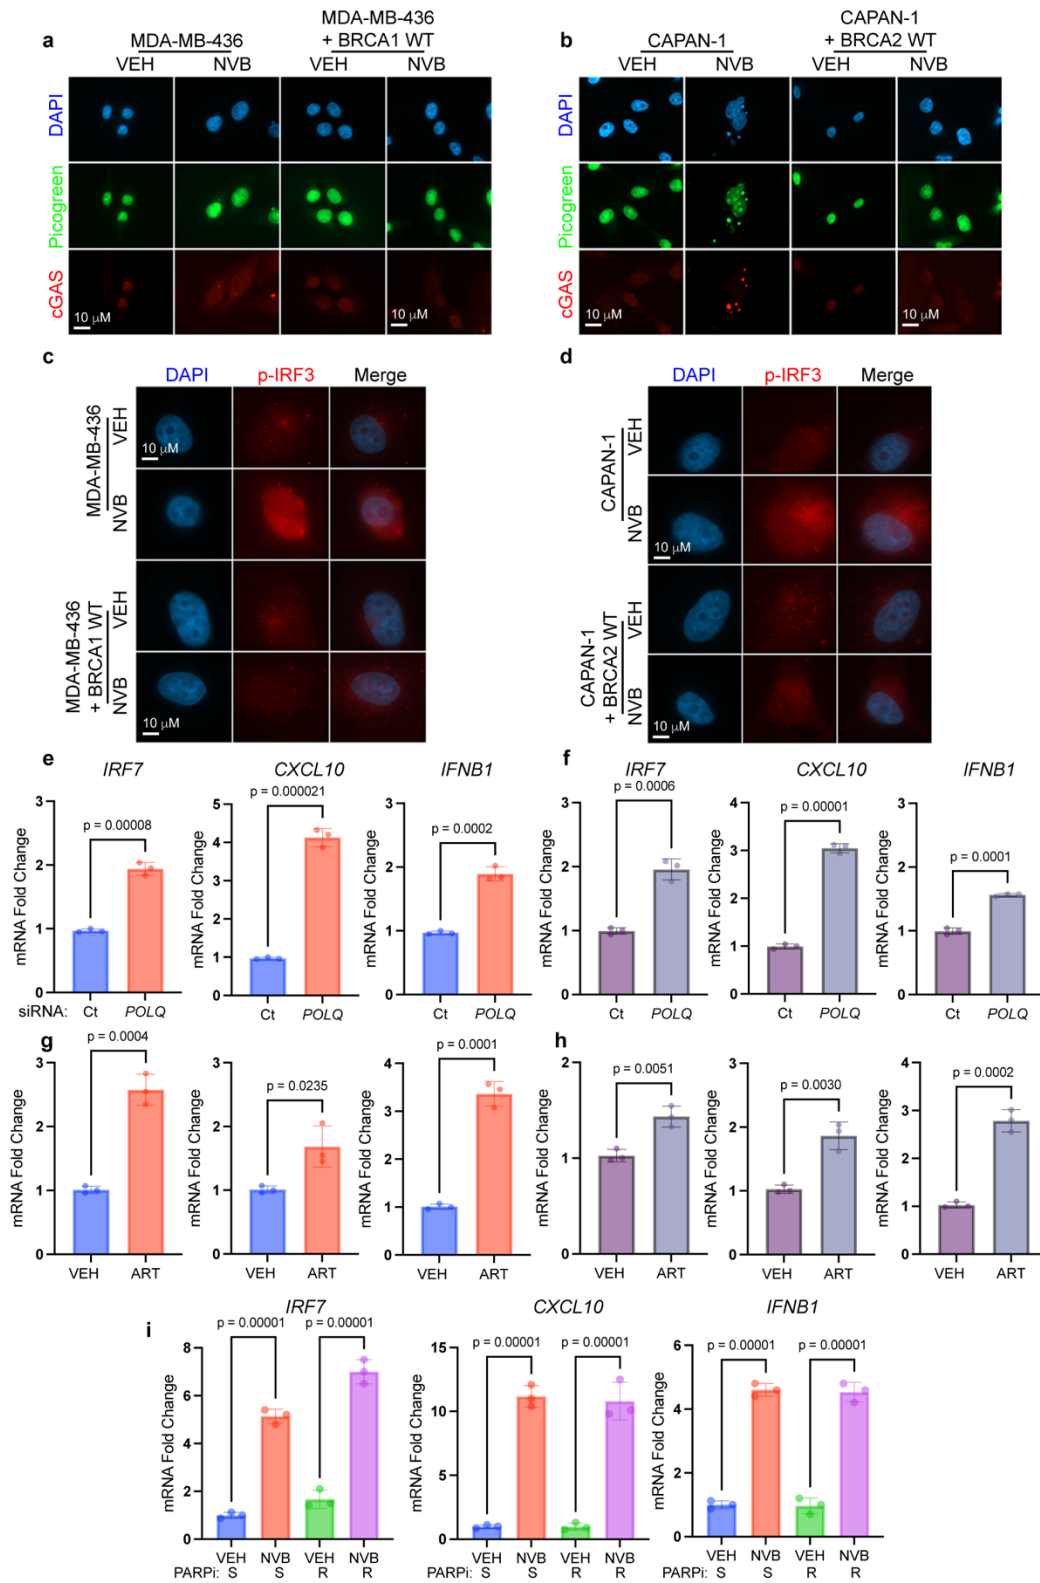

**Supplementary Fig. 4. POL $\theta$  inhibition activates the cGAS/STING pathway in HR-deficient cancers. a-b,** The pair of MDA-MB-436 +/- BRCA1 isogenic cell lines (**a**), or the pair of CAPAN-1 +/- BRCA2 isogenic cell lines (**b**) were treated with vehicle (DMSO) or 100  $\mu$ M NVB. After 48 hours, cells were fixed with paraformaldehyde, stained with picogreen, and subjected to immunofluorescence (IF) for cGAS. Representative IF images at 100x magnification, scale bars, 10  $\mu$ M,.. **c and d**, Isogenic cell line pairs (MDA-MD-436 +/- BRCA1, **c**) and (CAPAN-1 +/- BRCA2, **d**) were treated with DMSO or 100  $\mu$ M NVB for 48 hours. Cells were then fixed and subjected to immunofluorescence for pIRF3<sup>Ser396</sup>. Representative IF images at 100x magnification, scale bars, 10  $\mu$ M, **e, f**, Cell lines (MDA-MD-436, **e**; CAPAN-1, **f**) were transfected with siRNA targeting *POLQ*, and RNA was extracted, and qPCR performed. *IRF7*, *CXCL10*, and *IFBN1* mRNA levels were normalized to *ACTB* internal control. Data, mean +/- SD of 3 independent experiments. Statistical analyses were performed using unpaired two-tailed *t*-tests. **g, h**, Cell lines (MDA-MD-436, **g**; CAPAN-1, **h**) were treated with 1  $\mu$ M ART558 (ART) for 48 hours, and RNA was extracted, and qPCR performed. *IRF7*, *CXCL10*, and *IFBN1* mRNA levels were normalized to *ACTB* internal control. Data, mean +/- SD of 3 independent experiments. Statistical analyses were performed using unpaired two-tailed *t*-tests. **i**, PARPi resistant MDA-MB-436 cell lines were treated with DMSO or 100  $\mu$ M NVB for 48 hours, and RNA was extracted, and qPCR performed for *IRF7*, *CXCL10* and *IFBN1*, normalized to *ACTB* internal control. Data, mean +/- SD of 3 independent experiments. Statistical analyses were performed using unpaired two-tailed *t*-tests



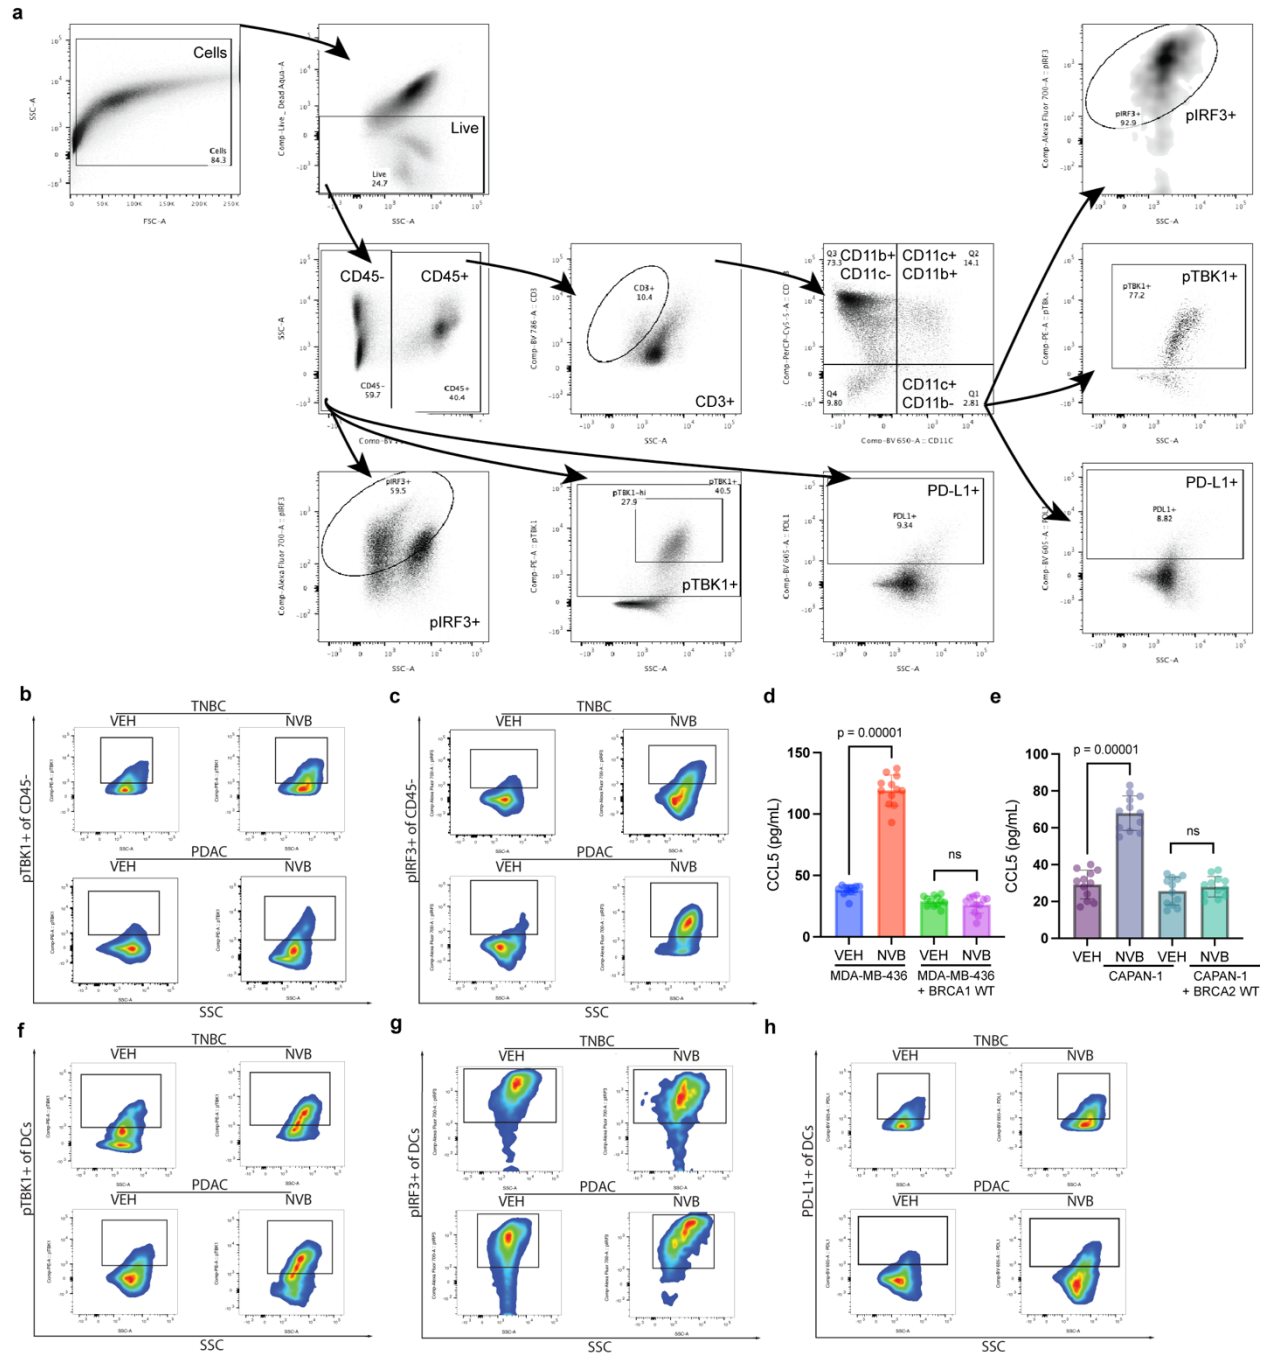

**Supplementary Fig. 5. POL $\theta$  inhibition in HR-deficient tumors induces the cGAS/STING pathway in dendritic cells.** **a**, Gating strategy for flow cytometry analysis. **b**, and **c**, Representative flow cytometry dotplots of TNBC and PDAC tumors from **5a-d**. **d** and **e**, Analysis of CCL5 levels by ELISA in the isogenic cell line pair MDA-MB-436 +/- BRCA1 (**d**), and the

isogenic cell line pair CAPAN-1 +/- BRCA2 (**d**) treated with DMSO or 100  $\mu$ M NVB for 48 hours. Data, mean $\pm$  SD of 3 independent experiments, unpaired two-way *t*-tests. **f**, **g**, and **h**, Representative flow cytometry dotplots of TNBC and PDAC tumors from **6a** and **b**.

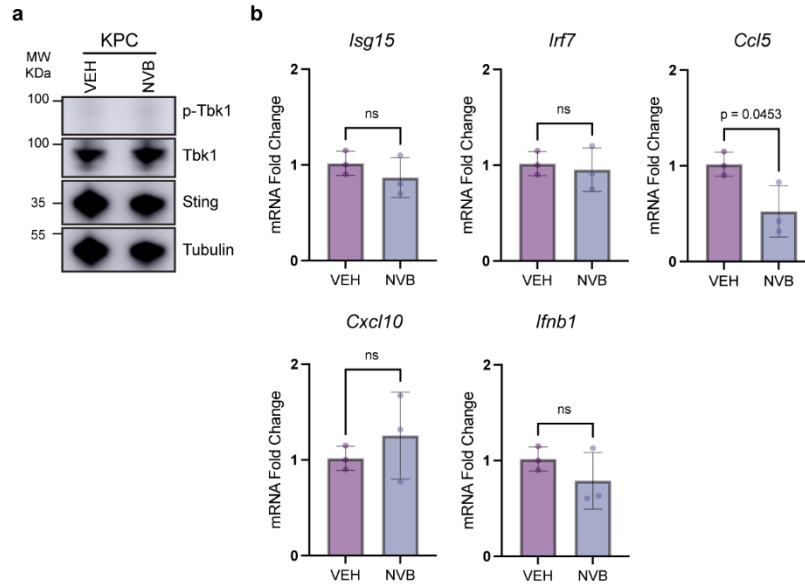

**Supplementary Fig. 6. HR-proficiency abolishes cGAS/STING pathway activation mediated by POLθ inhibition.** **a**, Immunoblot analysis of TBK1 phosphorylation in HR-proficient KPC cells upon 100 μM NVB treatment for 48 hours. NVB-mediated POLθ inhibition did not increase TBK1 phosphorylation. Immunoblot analysis performed in triplicate. **b**, KPC cells were treated with DMSO or 100 μM NVB for 48 hours, RNA was extracted, and qPCR performed. *ISG15*, *IRF7*, *CCL5*, *CXCL10*, and *IFNB1* mRNA levels were normalized to *ACTB* internal control. Data, mean+/-SD of 3 independent experiments, unpaired two-way *t*-tests.

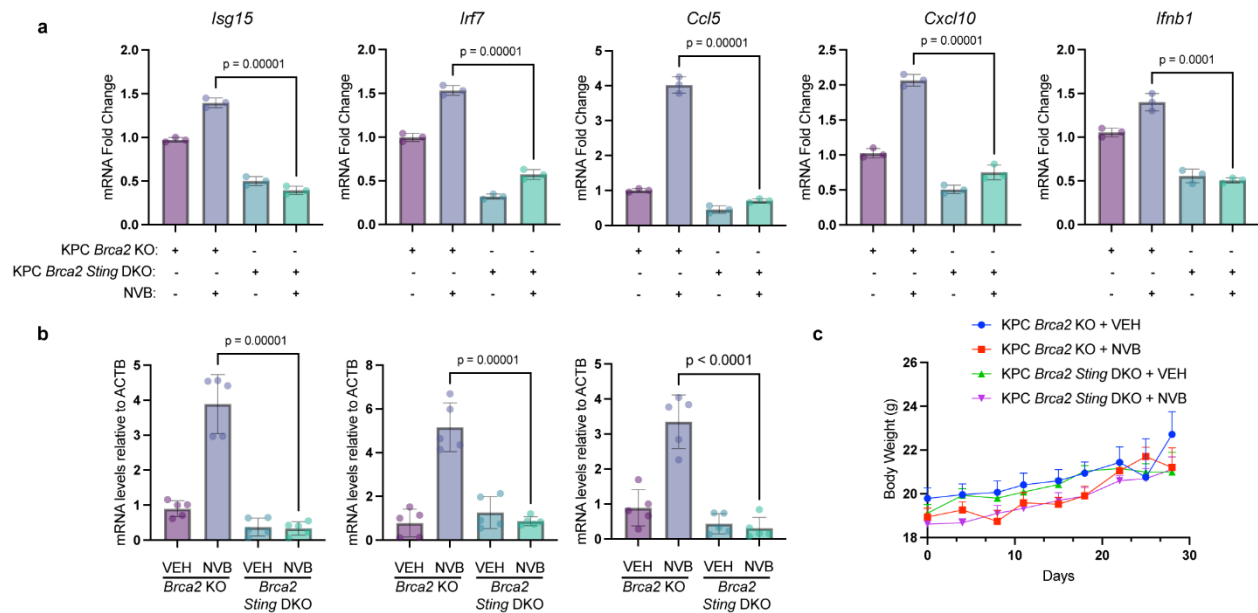

**Supplementary Fig. 7. POLθ inhibition in HR-deficient tumors induces the cGAS/STING pathway and is required for anti-tumor efficacy.** **a**, KPC *Brca2* KO CRISPR/Cas9 control or *Brca2* *Sting* DKO cells were treated with 100 μM NVB and subjected to qPCR. *Sting* depletion abolishes NVB-mediated upregulation of *Isg15*, *Irf7*, *Ccl5*, *Cxcl10*, and *Ifnb1* mRNA levels normalized to *ACTB* control. Data, mean +/- SD of 3 independent experiments. Significance of difference determined by one-way ANOVA. **b**, PDAC tumors *Brca2* KO (VEH, *n* = 5; NVB, *n* = 5), or *Brca2* *Sting* DKO (VEH, *n* = 5; NVB, *n* = 6) from vehicle- or twice daily 75 mg/kg NVB-treated mice were harvested 5 days after treatment and analyzed by whole tumor qPCR. Scatter plots show significant increases in *Ccl5*, *Cxcl10*, and *Ifnb1*. mRNA levels normalized to *ACTB* control from NVB-treated animals harboring *Brca2* KO PDAC tumors but not *Brca2* *Sting* DKO PDAC tumors. Error bars, SEM. Statistical analyses were performed using one-way ANOVA. **c**, Bodyweight measurements of KPC *Brca2* KO (VEH, *n* = 10; NVB, *n* = 10) or KPC *Brca2* *Sting* DKO (VEH, *n* = 10; NVB, *n* = 10) mice from **6g**. Data, mean +/- SEM.

## Supplementary Tables

**Supplementary Table 1: Antibodies**

| Antigen    | Conjugate   | Catalog #  | Manufacturer      | Method | Dilution  | RRFID            |
|------------|-------------|------------|-------------------|--------|-----------|------------------|
| BRCA2      | -           | 10741      | Cell Signaling    | WB     | 1:500     | RRID:AB_2797730  |
| CD45       | BV711       | 103147     | Biolegend         | FC     | 1:500     | RRID:AB_2564383  |
| CD3        | BV785       | 100232     | Biolegend         | FC     | 1:1000    | RRID:AB_2562554  |
| CD3        | -           | 99940      | Cell Signaling    | IHC    | 1:150     | RRID:AB_2755035  |
| CD4        | APC         | 100412     | Biolegend         | FC     | 1:1000    | RRID:AB_312697   |
| CD4        | -           | 25229      | Cell Signaling    | IHC    | 1:150     | RRID:AB_2798898  |
| CD68       | -           | 97778      | Cell Signaling    | IHC    | 1:200     | RRID:AB_2928056  |
| CD8        | BV421       | 100737     | Biolegend         | FC     | 1:1000    | RRID:AB_10897101 |
| CD8        | -           | 98941      | Cell Signaling    | IHC    | 1:400     | RRID:AB_2756376  |
| CD86       | -           | Nbp2-25208 | Novus Biologicals | IHC    | 0.5 µg/ml | RRID:AB_2923115  |
| CD163      | -           | 16646-1-ap | Proteintech       | IHC    | 1:150     | RRID:AB_2756528  |
| GrnzB      | FITC        | 515403     | Biolegend         | FC     | 1:250     | RRID:AB_2114575  |
| FoxP3      | PE/Cy7      | 25-5773-82 | eBioScience       | FC     | 1:100     | RRID:AB_891552   |
| CD11b      | Percp/Cy5.5 | 101228     | Biolegend         | FC     | 1:1000    | RRID:AB_893232   |
| pTBK1      | PE          | 13498S     | Cell Signaling    | FC     | 1:200     | RRID:AB_2798237  |
| pIRF3      | AF700       | 10327S     | Cell Signaling    | FC     | 1:100     | RRID:AB_2797719  |
| PD-L1      | BV605       | 124321     | Biolegend         | FC     | 1:500     | RRID:AB_2563635  |
| CD11C      | BV650       | 564079     | BD Bioscience     | FC     | 1:500     | RRID:AB_2725779  |
| dsDNA      | Pico-green  | 12010      | Lumiprobe         | IF     | 1:200     |                  |
| cGAS       | -           | 79978S     | Cell Signaling    | WB, IF | 1:500     | RRID:AB_2905508  |
| pTBK1      | -           | 5483S      | Cell Signaling    | WB     | 1:500     | RRID:AB_10693472 |
| TBK1       | -           | 3504S      | Cell Signaling    | WB     | 1:500     | RRID:AB_2255663  |
| PD-L1      | -           | 13684S     | Cell Signaling    | WB     | 1:500     | RRID:AB_2687655  |
| PD-L1      | -           | 64988      | Cell Signaling    | IHC    | 1:200     | RRID:AB_2799672  |
| pIRF3      | -           | 29047S     | Cell Signaling    | WB     | 1:500     | RRID:AB_2773013  |
| pSTING     | -           | 50907S     | Cell Signaling    | WB     | 1:500     | RRID:AB_2827656  |
| STING      | -           | 13647S     | Cell Signaling    | WB     | 1:500     | RRID:AB_2732796  |
| pSTAT1     | -           | 9167S      | Cell Signaling    | WB     | 1:500     | RRID:AB_561284   |
| STAT1      | -           | 149945     | Cell Signaling    | WB     | 1:500     |                  |
| Tubulin    | -           | ab7291     | abcam             | WB     | 1:5000    | RRID:AB_2241126  |
| Vinculin   | -           | sc-25336   | Santa Cruz        | WB     | 1:200     | RRID:AB_628438   |
| POLQ       | -           | MBS9612322 | MyBioSource       | WB     | 1:500     |                  |
| gH2AX      | -           | 05-636-1   | EMD Millipore     | IF     | 1:1000    |                  |
| gH2AX      | -           | 9718       | Cell Signaling    | IF     | 1:1000    | RRID:AB_2118009  |
| rabbit IgG | HRP         | ab6728     | abcam             | WB     | 1:5000    | RRID:AB_955440   |
| mouse IgG  | HRP         | ab97023    | abcam             | WB     | 1:5000    | RRID:AB_10679675 |
| rabbit IgG | 594         |            | Thermofisher      | IF     | 1:5000    |                  |
| mouse IgG  | 488         |            | Thermofisher      | IF     | 1:5000    |                  |

FC: flow cytometry, WB: Western blotting, IF: immunofluorescence, IHC: immunohistochemistry

**Supplementary Table 2: qPCR probe assays**

| Species | Gene          | Assay ID             | Primer Sequences                                         |
|---------|---------------|----------------------|----------------------------------------------------------|
| Mouse   | <i>ACTB</i>   | Mm.PT.39a.22214843.g | 5'-GATTACTGCTCTGGCTCCTAG<br>5'-GACTCATCGTACTCCTGCTTG     |
|         | <i>Isg15</i>  | Mm.PT.58.41476392.g  | 5'-CACAGTGATCAAGCATTTGCG<br>5'-CCCCATCATCTTTTATAACCAAC   |
|         | <i>Irf7</i>   | Mm.PT.58.32394021.g  | 5'-GCATCACAGAGTAGTAGCATCT<br>5'-CCAATAGCCAGTCTCCAAACAG   |
|         | <i>CCL5</i>   | Mm.PT.58.43548565    | 5'-GCTCCAATCTTGCAAGTCGT<br>5'-CCTCTATCCTAGCTCATCTCCA     |
|         | <i>CXCL10</i> | Mm.PT.58.43575827    | 5'-ATTTTCTGCCTCATCCTGCT<br>5'-TGATTTCAAGCTTCCCTATGGC     |
|         | <i>Ifnb1</i>  | Mm.PT.58.30132453.g  | 5'-ACTCATGAAGTACAACAGCTACG<br>5'-GGCATCAACTGACAGGTCTT    |
|         | <i>PD-L1</i>  | Mm.PT.58.41689106    | 5'-TCTCAATCAGGTCTCCAGGT<br>5'-AGCTGATCCACAAACAAGAGG      |
|         | <i>POLQ</i>   | Mm.PT.58.5536034     | 5'-GCCAGTCACCCAAATAGTTCT<br>5'-GATAGTGCGGAGGTAGAGGT      |
|         | <i>ACTB</i>   | Hs.PT.39a.22214847   | 5'-ACAGAGCCTCGCCTTTG<br>5'-CCTTGACATGCCGGAG              |
|         | <i>Isg15</i>  | Hs.PT.58.39185901.g  | 5'-GCCTTCAGCTCTGACACC<br>5'-CGAACTCATCTTTGCCAGTACA       |
| Human   | <i>Irf7</i>   | Hs.PT.58.24613215.g  | 5'-TCAACACCTGTGACTTCATGT<br>5'-GTGGACTGAGGGCTTGTAG       |
|         | <i>CCL5</i>   | Hs.PT.58.1724551     | 5'-GCTGTCATCCTCATTGCTACT<br>5'-TGCCACTGGTGTAGAAATACTC    |
|         | <i>CXCL10</i> | Hs.PT.58.3790956.g   | 5'-GACATATTCTGAGCCTACAGCA<br>5'-CAGTTCTAGAGAGAGGTACTCCT  |
|         | <i>Ifnb1</i>  | Hs.PT.58.39481063.g  | 5'-GAAACTGAAGATCTCCTAGCCT<br>5'-GCCATCAGTCACTTAAACAGC    |
|         | <i>PD-L1</i>  | Hs.PT.56a.21399083.g | 5'-CTTTGAGTTTGTATCTTGGATGCC<br>5'-AGGACTCACTTGGTAATTCTGG |
|         | <i>POLQ</i>   | Hs.PT.58.25668129    | 5'-TCTTCAACTGCTTCCTCTTCC<br>5'-GAGCAAATATTGTGGAGGTGGA    |

Source data for immunoblots presented in Supplementary figures 1 and 6

Supplementary figure 1a

PD-L1

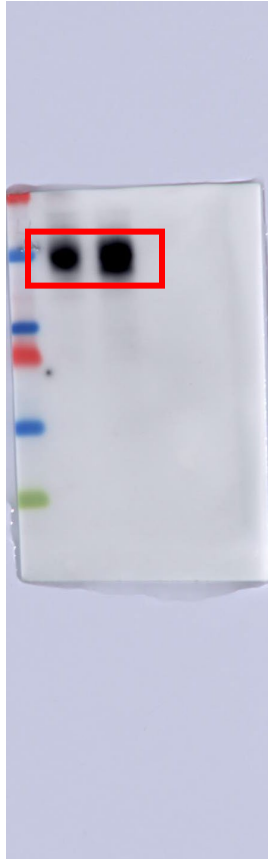

POLQ

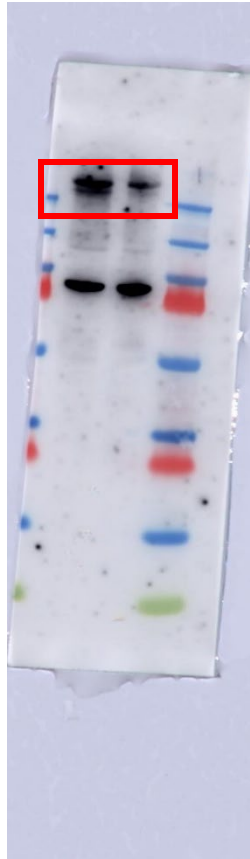

Vinculin

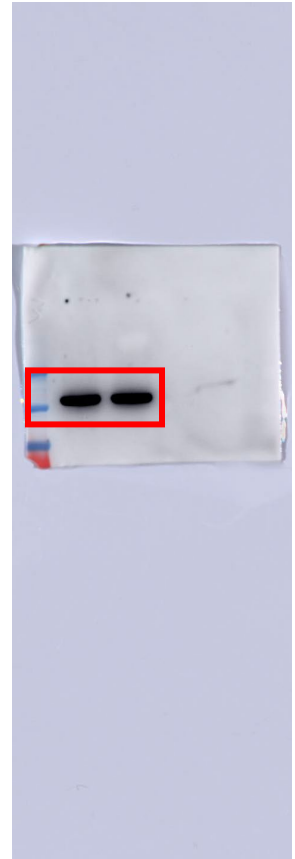

**Supplementary figure 1b**

PD-L1

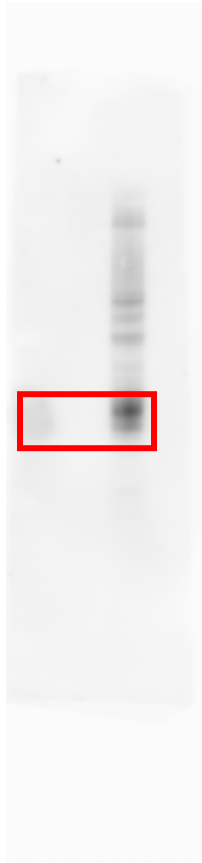

POLQ

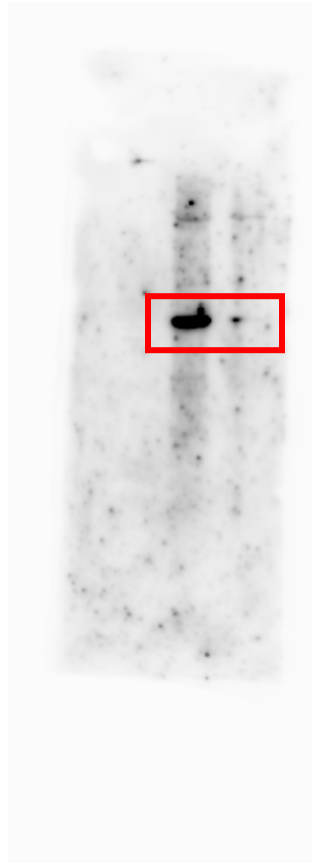

Vinculin

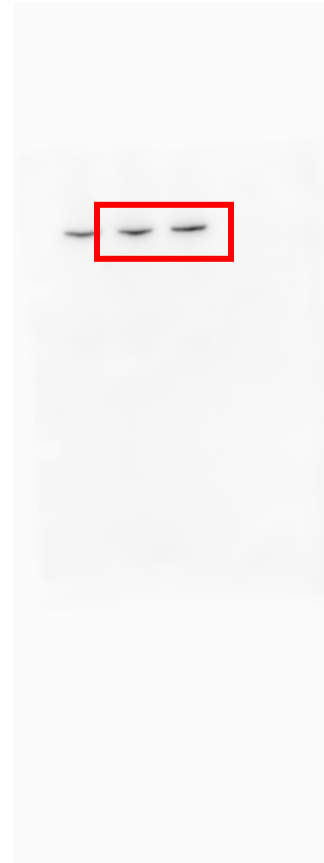



## Supplementary figure 6a

p-Tbk1

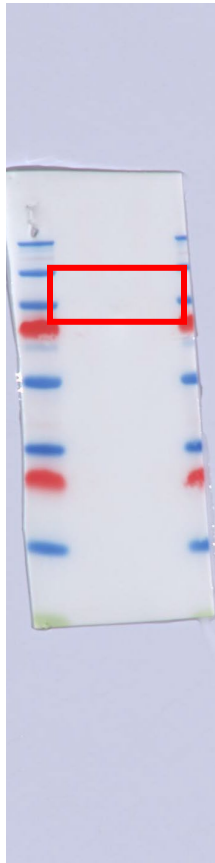

Tbk1

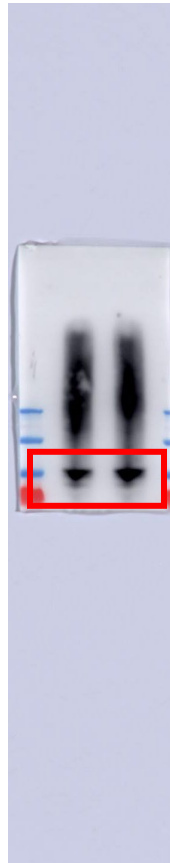

Sting

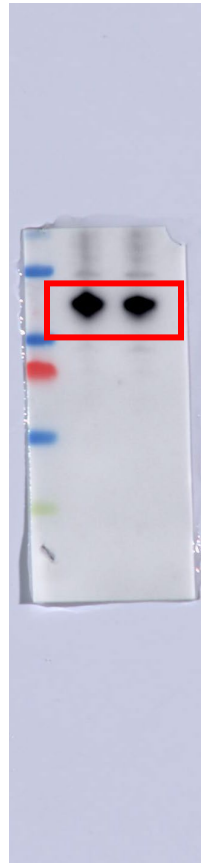

Tubulin

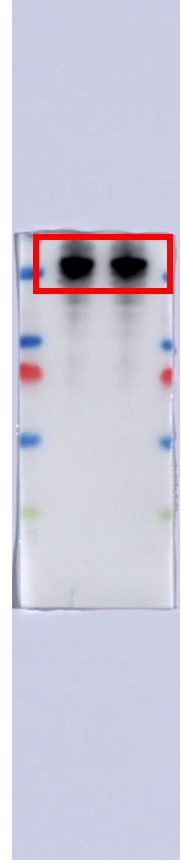

Supplement: MOESM1 [file 41467_2023_37096_MOESM1_ESM.pdf]
